# Supplementary material
Source: ML conference proceedings conference paper supplement (https://openreview.net/forum?id=yxUAWvNqSH)

ImageNet (CoaT)

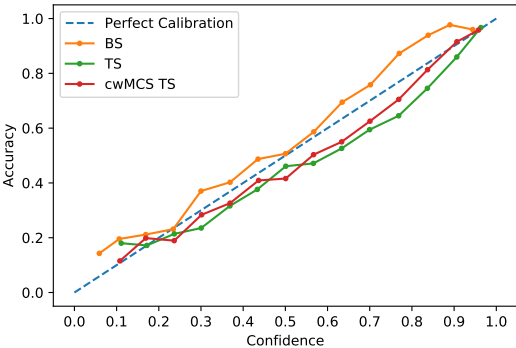

ImageNet (DeiT)

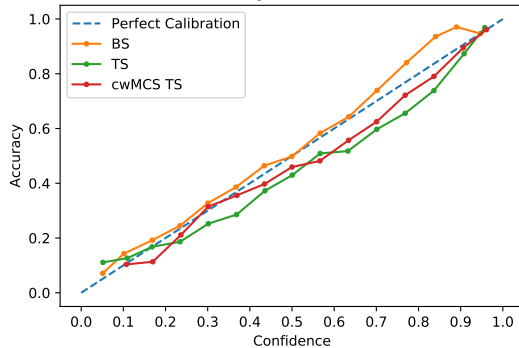

ImageNet (EfficientNet)

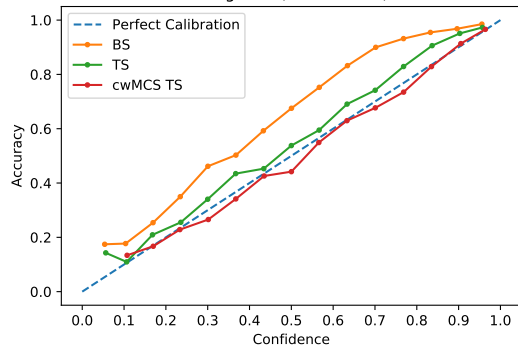

Cifar100 (ResNet34)

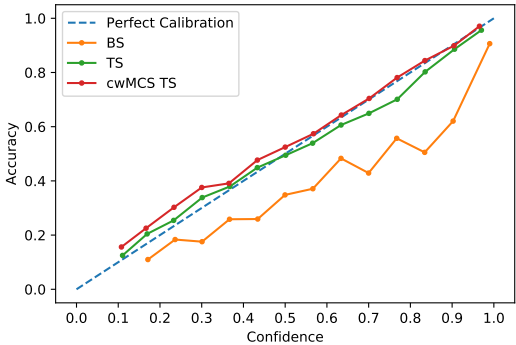

TweetEmo (RoBERTa)

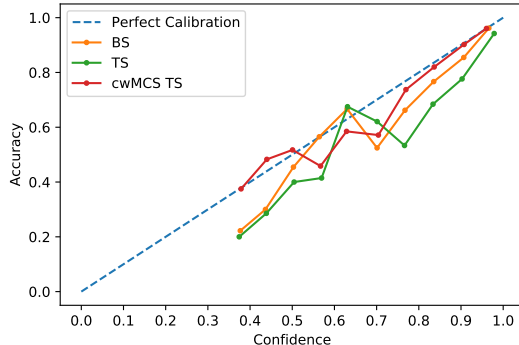

Tiny\_IN (ResNet50)

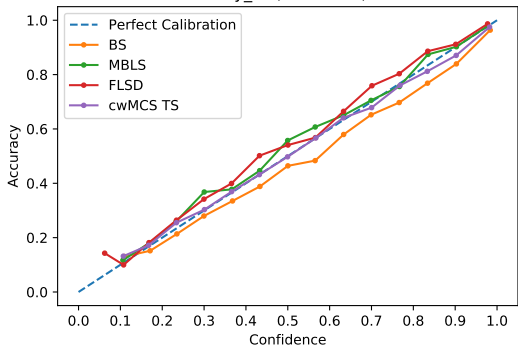

Supplement: supplementary_material [file attachment]
