# Supplementary material
Source: ML conference proceedings conference paper supplement (https://openreview.net/forum?id=yxUAWvNqSH)

Comparison of FD Performance (Ours VS SOTA)

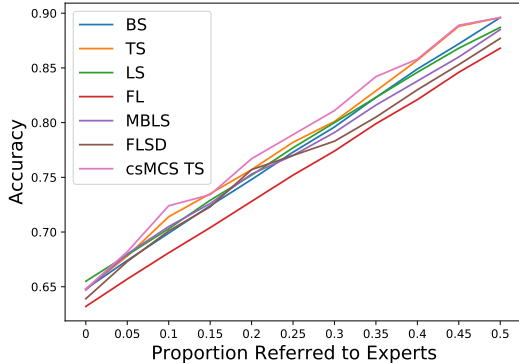

FD with MCS Calibrated Uncertainty (Ours)

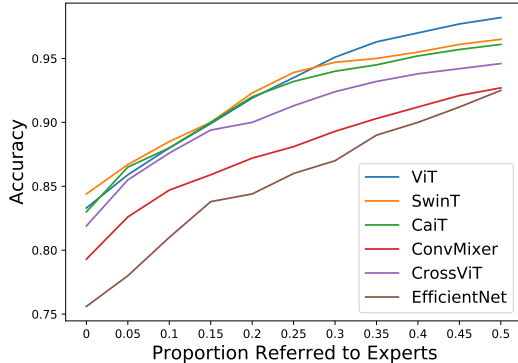

FD with Uncertainty

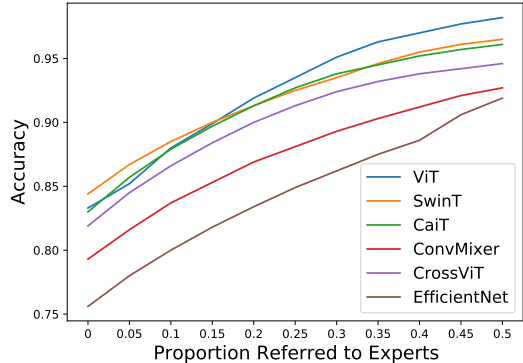

Supplement: supplementary_material [file attachment]
